# Supplementary material for: Hyperbrain features of team mental models within a juggling paradigm: a proof of concept
Source: PubMed Central journal article supplement (PMC5036110; doi:10.7717/peerj.2457), 2016-09-20
Supplement: peerj-04-2457-s001.pdf [file peerj-04-2457-s001.pdf]

subject 1

Table with 40 columns (Fp1 to O2) and 40 rows (Fp1 to O2) for subject 1. Each cell contains a numerical value representing data points for this subject.

subject 2

Table with 40 columns (Fp1 to O2) and 40 rows (Fp1 to O2) for subject 2. Each cell contains a numerical value representing data points for this subject.
