# Supplementary material for: Hyperbrain features of team mental models within a juggling paradigm: a proof of concept
Source: PubMed Central journal article supplement (PMC5036110; doi:10.7717/peerj.2457), 2016-09-20
Supplement: peerj-04-2457-s002.pdf [file peerj-04-2457-s002.pdf]

subject 1

Table with 28 columns (Fp1 to O2) and 28 rows (Fp1 to O2) for subject 1. Each cell contains a numerical value representing data points for various categories.

Table with 28 columns (Fp1 to O2) and 28 rows (Fp1 to O2) for subject 1. This section continues the data for subject 1, showing a dense grid of numerical values.

subject 2

Table with 28 columns (Fp1 to O2) and 28 rows (Fp1 to O2) for subject 2. Each cell contains a numerical value representing data points for various categories.

Table with 28 columns (Fp1 to O2) and 28 rows (Fp1 to O2) for subject 2. This section continues the data for subject 2, showing a dense grid of numerical values.
