# Supplementary material for: Hyperbrain features of team mental models within a juggling paradigm: a proof of concept
Source: PubMed Central journal article supplement (PMC5036110; doi:10.7717/peerj.2457), 2016-09-20
Supplement: peerj-04-2457-s003.pdf [file peerj-04-2457-s003.pdf]

subject 1

|            | Fp1 | Fpz      | Fp2      | F7       | F3       | Fz       | F4       | F8       | FC5      | FC1      | FC2      | FC6      | T7       | C3       | Cz       | C4       | T8       | CP5      | CP1      | CP2      | CP6      | P7       | P3       | P4       | P8       | POz      | O1     | O2       | Fp1      | Fpz      | Fp2      | F7       | F3       | Fz       | F4       | F8       | FC5      | FC1      | FC2      | FC6      | T7       | C3       | Cz       | C4       | T8       | CP5      | CP1      | CP2      | CP6      | P7       | P3      | Pz       | P4       | P8       | POz      | O1       | O2       |          |
|------------|-----|----------|----------|----------|----------|----------|----------|----------|----------|----------|----------|----------|----------|----------|----------|----------|----------|----------|----------|----------|----------|----------|----------|----------|----------|----------|--------|----------|----------|----------|----------|----------|----------|----------|----------|----------|----------|----------|----------|----------|----------|----------|----------|----------|----------|----------|----------|----------|----------|----------|---------|----------|----------|----------|----------|----------|----------|----------|
| <b>Fp1</b> | 0   | 0.013108 | 0.010606 | 0.026213 | 0.031461 | 0.030386 | 0.036047 | 0.016691 | 0.025165 | 0.033274 | 0.044096 | 0.039107 | 0.035295 | 0.024422 | 0.042774 | 0.043602 | 0.025555 | 0.031865 | 0.025698 | 0.027229 | 0.019548 | 0.027197 | 0.024875 | 0.038414 | 0.025325 | 0.020666 | 0.0409 | 0.038853 | 0.040263 | 0.029919 | 0.029363 | 0.027579 | 0.029843 | 0.033855 | 0.030246 | 0.030278 | 0.024109 | 0.026261 | 0.029183 | 0.027651 | 0.028737 | 0.028136 | 0.027869 | 0.030329 | 0.029816 | 0.019687 | 0.020056 | 0.027579 | 0.027884 | 0.027342 | 0.02131 | 0.011934 | 0.026703 | 0.030735 | 0.027543 | 0.025994 | 0.030695 | 0.027823 |

subject 2

|            | Fp1 | Fpz      | Fp2      | F7       | F3       | Fz       | F4       | F8       | FC5      | FC1      | FC2      | FC6      | T7       | C3       | Cz       | C4       | T8       | CP5      | CP1      | CP2      | CP6      | P7       | P3       | Pz       | P4       | P8       | POz    | O1       | O2       | Fp1      | Fpz      | Fp2      | F7       | F3       | Fz       | F4       | F8       | FC5      | FC1      | FC2      | FC6      | T7       | C3       | Cz       | C4       | T8       | CP5      | CP1      | CP2      | CP6      | P7      | P3       | Pz       | P4       | P8       | POz      | O1       | O2       |
|------------|-----|----------|----------|----------|----------|----------|----------|----------|----------|----------|----------|----------|----------|----------|----------|----------|----------|----------|----------|----------|----------|----------|----------|----------|----------|----------|--------|----------|----------|----------|----------|----------|----------|----------|----------|----------|----------|----------|----------|----------|----------|----------|----------|----------|----------|----------|----------|----------|----------|----------|---------|----------|----------|----------|----------|----------|----------|----------|
| <b>Fp1</b> | 0   | 0.013108 | 0.010606 | 0.026213 | 0.031461 | 0.030386 | 0.036047 | 0.016691 | 0.025165 | 0.033274 | 0.044096 | 0.039107 | 0.035295 | 0.024422 | 0.042774 | 0.043602 | 0.025555 | 0.031865 | 0.025698 | 0.027229 | 0.019548 | 0.027197 | 0.024875 | 0.038414 | 0.025325 | 0.020666 | 0.0409 | 0.038853 | 0.040263 | 0.029919 | 0.029363 | 0.027579 | 0.029843 | 0.033855 | 0.030246 | 0.030278 | 0.024109 | 0.026261 | 0.029183 | 0.027651 | 0.028737 | 0.028136 | 0.027869 | 0.030329 | 0.029816 | 0.019687 | 0.020056 | 0.027579 | 0.027884 | 0.027342 | 0.02131 | 0.011934 | 0.026703 | 0.030735 | 0.027543 | 0.025994 | 0.030695 | 0.027823 |
