# Supplementary material for: Hyperbrain features of team mental models within a juggling paradigm: a proof of concept
Source: PubMed Central journal article supplement (PMC5036110; doi:10.7717/peerj.2457), 2016-09-20
Supplement: peerj-04-2457-s004.pdf [file peerj-04-2457-s004.pdf]

subject 1

Table with columns: Fp1, Fp2, F7, F3, Fz, F4, F8, FCS, FC1, FC2, FC6, T7, C3, Cz, C4, T8, CP5, CP1, CP2, CP6, P7, P3, Pz, P4, P8, POz, O1, O2, Fp1, Fp2, F7, F3, Fz, F4, F8, FCS, FC1, FC2, FC6, T7, C3, Cz, C4, T8, CP5, CP1, CP2, CP6, P7, P3, Pz, P4, P8, POz, O1, O2. This table contains the first subject's data.

S  
u  
b  
j  
e  
c  
t  
1

subject 2

Table with columns: Fp1, Fp2, F7, F3, Fz, F4, F8, FCS, FC1, FC2, FC6, T7, C3, Cz, C4, T8, CP5, CP1, CP2, CP6, P7, P3, Pz, P4, P8, POz, O1, O2, Fp1, Fp2, F7, F3, Fz, F4, F8, FCS, FC1, FC2, FC6, T7, C3, Cz, C4, T8, CP5, CP1, CP2, CP6, P7, P3, Pz, P4, P8, POz, O1, O2. This table contains the second subject's data.

S  
u  
b  
j  
e  
c  
t  
2
