# Supplementary material for: Hyperbrain features of team mental models within a juggling paradigm: a proof of concept
Source: PubMed Central journal article supplement (PMC5036110; doi:10.7717/peerj.2457), 2016-09-20
Supplement: peerj-04-2457-s008.pdf [file peerj-04-2457-s008.pdf]

subject 1

Table with 25 columns (Fp1 to O2) and 48 rows (Fp1 to O2). Contains numerical data for subject 1.

subject 2

Table with 25 columns (Fp1 to O2) and 48 rows (Fp1 to O2). Contains numerical data for subject 2.
