# Supplementary material for: Hyperbrain features of team mental models within a juggling paradigm: a proof of concept
Source: PeerJ. 2016 Sep 20;4:e2457. doi: 10.7717/peerj.2457 (PMC5036110; doi:10.7717/peerj.2457)
Supplement: Supplemental Information 5 [file peerj-04-2457-s005.pdf]

subject 1

Fp1

Fp2

Fp3

Fp4

Fp5

Fp6

Fp7

Fp8

Fp9

Fp10

Fp11

Fp12

Fp13

Fp14

Fp15

Fp16

Fp17

Fp18

Fp19

Fp20

Fp21

Fp22

Fp23

Fp24

Fp25

Fp26

Fp27

Fp28

Fp29

Fp30

Fp31

Fp32

Fp33

Fp34

Fp35

Fp36

Fp37

Fp38

Fp39

Fp40

Fp41

Fp42

Fp43

Fp44

Fp45

Fp46

Fp47

Fp48

Fp49

Fp50

Fp51

Fp52

Fp53

Fp54

Fp55

Fp56

Fp57

Fp58

Fp59

Fp60

Fp61

Fp62

Fp63

Fp64

Fp65

Fp66

Fp67

Fp68

Fp69

Fp70

Fp71

Fp72

Fp73

Fp74

Fp75

Fp76

Fp77

Fp78

Fp79

Fp80

Fp81

Fp82

Fp83

Fp84

Fp85

Fp86

Fp87

Fp88

Fp89

Fp90

Fp91

Fp92

Fp93

Fp94

Fp95

Fp96

Fp97

Fp98

Fp99

Fp100

F1

F2

F3

F4

F5

F6

F7

F8

F9

F10

F11

F12

F13

F14

F15

F16

F17

F18

F19

F20

F21

F22

F23

F24

F25

F26

F27

F28

F29

F30

F31

F32

F33

F34

F35

F36

F37

F38

F39

F40

F41

F42

F43

F44

F45

F46

F47

F48

F49

F50

F51

F52

F53

F54

F55

F56

F57

F58

F59

F60

F61

F62

F63

F64

F65

F66

F67

F68

F69

F70

F71

F72

F73

F74

F75

F76

F77

F78

F79

F80

F81

F82

F83

F84

F85

F86

F87

F88

F89

F90

F91

F92

F93

F94

F95

F96

F97

F98

F99

F100

P1

P2

P3

P4

P5

P6

P7

P8

P9

P10

P11

P12

P13

P14

P15

P16

P17

P18

P19

P20

P21

P22

P23

P24

P25

P26

P27

P28

P29

P30

P31

P32

P33

P34

P35

P36

P37

P38

P39

P40

P41

P42

P43

P44

P45

P46

P47

P48

P49

P50

P51

P52

P53

P54

P55

P56

P57

P58

P59

P60

P61

P62

P63

P64

P65

P66

P67

P68

P69

P70

P71

P72

P73

P74

P75

P76

P77

P78

P79

P80

P81

P82

P83

P84

P85

P86

P87

P88

P89

P90

P91

P92

P93

P94

P95

P96

P97

P98

P99

P100

C1

C2

C3

C4

C5

C6

C7

C8

C9

C10

C11

C12

C13

C14

C15

C16

C17

C18

C19

C20

C21

C22

C23

C24

C25

C26

C27

C28

C29

C30

C31

C32

C33

C34

C35

C36

C37

C38

C39

C40

C41

C42

C43

C44

C45

C46

C47

C48

C49

C50

C51

C52

C53

C54

C55

C56

C57

C58

C59

C60

C61

C62

C63

C64

C65

C66

C67

C68

C69

C70

C71

C72

C73

C74

C75

C76

C77

C78

C79

C80

C81

C82

C83

C84

C85

C86

C87

C88

C89

C90

C91

C92

C93

C94

C95

C96

C97

C98

C99

C100

O1

O2

O3

O4

O5

O6

O7

O8

O9

O10

O11

O12

O13

O14

O15

O16

O17

O18

O19

O20

O21

O22

O23

O24

O25

O26

O27

O28

O29

O30

O31

O32

O33

O34

O35

O36

O37

O38

O39

O40

O41

O42

O43

O44

O45

O46

O47

O48

O49

O50

O51

O52

O53

O54

O55

O56

O57

O58

O59

O60

O61

O62

O63

O64

O65

O66

O67

O68

O69

O70

O71

O72

O73

O74

O75

O76

O77

O78

O79

O80

O81

O82

O83

O84

O85

O86

O87

O88

O89

O90

O91

O92

O93

O94

O95

O96

O97

O98

O99

O100
